# Supplementary material for: In Silico Oncology: Quantification of the In Vivo Antitumor Efficacy of Cisplatin-Based Doublet Therapy in Non-Small Cell Lung Cancer (NSCLC) through a Multiscale Mechanistic Model
Source: PubMed Central journal article supplement (PMC5033576; doi:10.1371/journal.pcbi.1005093), 2016-09-22
Supplement: pcbi.1005093.s005.pdf [file pcbi.1005093.s005.pdf]

## S5 Text

### Value range of spontaneous apoptosis rate

Based on Eq. (8) in Kolokotroni *et al.* (2011), the apoptosis rate of stem and LIMP cells,  $R_A$ , must satisfy the following inequality in order to have a stable or growing tumor:

$$e^{R_A T_c} \leq (1 + P_{sym})(1 - P_{sleep} + P_{sleep} \frac{P_{G_0 \rightarrow G_1} / T_{G_0}}{R_A + 1 / T_{G_0}}) \quad (1)$$

The second term of the above inequality is maximized for the maximum value of  $P_{sym}$ , i.e. 0.4 (the upper bound of this parameter considered in the present work) and the minimum value of  $P_{sleep}$ , i.e. 0. By substituting the above values in Eq (1), and after performing some derivations, the upper bound of  $R_A$  for a given cell cycle duration,  $T_c$ , can be derived, above which no solution, i.e. set of parameter values that gives a stable or growing tumor, exists:

$$R_A \leq \frac{\ln 1.4}{T_c} \quad (2)$$

Let [18, 134] be the considered value range of  $T_c$ . When  $R_A$  is below the lower bound of the second term in Eq (2), i.e.  $\ln 1.4 / 134 \approx 0.0025 \text{h}^{-1}$ , a solution exists for all values of  $T_c$  considered. In the present work  $R_A$  has been assumed to vary between 0 and  $0.001 \text{h}^{-1}$ .

## References

Kolokotroni EA, Dionysiou DD, Uzunoglu NK, Stamatakos GS. Studying the growth kinetics of untreated clinical tumors by using an advanced discrete simulation model. *Math Comput Model.* 2011;54:1989-2006. doi:10.1016/j.mcm.2011.05.007
