# Supplementary material for: In Silico Oncology: Quantification of the In Vivo Antitumor Efficacy of Cisplatin-Based Doublet Therapy in Non-Small Cell Lung Cancer (NSCLC) through a Multiscale Mechanistic Model
Source: PubMed Central journal article supplement (PMC5033576; doi:10.1371/journal.pcbi.1005093), 2016-09-22
Supplement: pcbi.1005093.s010.pdf [file pcbi.1005093.s010.pdf]

*In Silico Oncology: Quantification of the In Vivo Antitumor Efficacy of Cisplatin-Based Doublet Therapy in Non-Small Cell Lung Cancer (NSCLC) through a Multiscale Mechanistic Model*

Eleni Kolokotroni, Dimitra Dionysiou, Christian Veith, Yoo-Jin Kim, Jörg Sabczynski, Astrid Franz, Aleksandar Grgic, Jan Palm, Rainer M. Bohle, Georgios Stamatakos

**S1 Table**  
**Supplemental PRCC analyses**

| Analysis A       |         |                         | Analysis B       |         |                         |
|------------------|---------|-------------------------|------------------|---------|-------------------------|
| Feature          | PRCC    | p-value                 | Feature          | PRCC    | p-value                 |
| Stem/LIMP        | 0.129   | 2.47*10 <sup>-3</sup>   | Stem/DIFF        | 0.113   | 7.97*10 <sup>-3</sup>   |
| LIMP/Living      | 0.131   | 2.11*10 <sup>-3</sup>   | LIMP/Living      | 0.111   | 9.08*10 <sup>-3</sup>   |
| Growth Fraction  | -0.487  | 6.00*10 <sup>-34</sup>  | Growth Fraction  | -0.489  | 3.73*10 <sup>-34</sup>  |
| Quiescent/Living | -0.0823 | 0.0544                  | Quiescent/Living | -0.0845 | 0.0482                  |
| Apoptotic/Total  | 0.0187  | 0.663                   | Apoptotic/Total  | 0.0184  | 0.667                   |
| Necrotic/Total   | 0.121   | 4.76*10 <sup>-3</sup>   | Necrotic/Total   | 0.120   | 4.90*10 <sup>-3</sup>   |
| T <sub>d</sub>   | -0.813  | 2.62*10 <sup>-130</sup> | T <sub>d</sub>   | -0.813  | 2.20*10 <sup>-130</sup> |

Values rounded to three significant figures

DIFF: terminally differentiated tumor cell, LIMP: Limited Mitotic Potential tumor cell, T<sub>d</sub>: volume doubling time
